# Supplementary material for: Standardized Care Pathways Mitigate Occupational Disparities in Pregnancy Outcomes Among Nulliparous Women with Gestational Diabetes: A Propensity-Score-Matched Study
Source: Research Square preprint supplement (doi:10.21203/rs.3.rs-8462398/v1), 2026-01-23
Supplement: Supplementary file 1 [file 85f4da4e8cbbcc7db3bef660.docx]

STROBE Statement—checklist of items that should be included in reports of observational studies

|  | Item No. | Recommendation | Page  No. | Relevant text from manuscript |
| --- | --- | --- | --- | --- |
| **Title and abstract** | 1 | (*a*) Indicate the study’s design with a commonly used term in the title or the abstract | P1(L1-2) | Title: “Standardized Care Pathways Mitigate Occupational Disparities in Pregnancy Outcomes Among Nulliparous Women with Gestational Diabetes: A Propensity-Score-Matched Study” |
| (*b*) Provide in the abstract an informative and balanced summary of what was done and what was found | P2-3(L46-51) | Abstract: “we show that gestational weight gain, caesarean section rate … did not differ between employed and unemployed women.” |
| Introduction | | | |  |
| Background/rationale | 2 | Explain the scientific background and rationale for the investigation being reported | P4(L76-86) | “The rising incidence of GDM reflects intertwined genetic, behavioral and environmental drivers …” |
| Objectives | 3 | State specific objectives, including any prespecified hypotheses | P2(L35-37) | “This study aimed to determine whether employment status influences pregnancy outcomes in nulliparous women with GDM …” |
| Methods | | | |  |
| Study design | 4 | Present key elements of study design early in the paper | P2(L39-40) | “We conducted a retrospective analysis of deliveries (2020–2024) at a tertiary hospital.” |
| Setting | 5 | Describe the setting, locations, and relevant dates, including periods of recruitment, exposure, follow-up, and data collection | P4(L89-90) | “Electronic medical records were searched on 12 August 2025 to identify all deliveries between 01 January 2020 and 31 December 2024.” |
| Participants | 6 | (*a*) *Cohort study*—Give the eligibility criteria, and the sources and methods of selection of participants. Describe methods of follow-up  *Case-control study*—Give the eligibility criteria, and the sources and methods of case ascertainment and control selection. Give the rationale for the choice of cases and controls  *Cross-sectional study*—Give the eligibility criteria, and the sources and methods of selection of participants | P4(L92-93) | “Of 764 women with a GDM diagnosis, 595 met inclusion criteria after exclusion (Figure 1).” |
| (*b*)*Cohort study*—For matched studies, give matching criteria and number of exposed and unexposed  *Case-control study*—For matched studies, give matching criteria and the number of controls per case | P4(L93-95) | “To eliminate confounding by obstetric history, we restricted the primary analysis to the 240 primiparous women … 1:1 propensity-score matching … caliper = 0.15.” |
| Variables | 7 | Clearly define all outcomes, exposures, predictors, potential confounders, and effect modifiers. Give diagnostic criteria, if applicable | P6(L104-110) | “GDM was defined by the International Association of Diabetes and Pregnancy Study Groups criteria …” |
| Data sources/ measurement | 8* | For each variable of interest, give sources of data and details of methods of assessment (measurement). Describe comparability of assessment methods if there is more than one group | P4(L88-89) | | “Data sources included the hospital’s electronic medical record system and maternal health records …” | | --- | |
| Bias | 9 | Describe any efforts to address potential sources of bias | P7(L137-140) | “Balance was evaluated with the standardized mean difference (SMD); an SMD < 0.10 signified negligible imbalance.” |
| Study size | 10 | Explain how the study size was arrived at | P7(L145-148) | “The analysis yielded 62 matched pairs …” (sample size determined by available records and matching quality) |

Continued on next page

| Quantitative variables | 11 | Explain how quantitative variables were handled in the analyses. If applicable, describe which groupings were chosen and why | P7(L142-143) | “Continuous and categorical outcomes were compared using Student’s t or Mann–Whitney U tests …” |
| --- | --- | --- | --- | --- |
| Statistical methods | 12 | (*a*) Describe all statistical methods, including those used to control for confounding | P2(L41-42) | “Propensity-score matching (1:1, caliper = 0.15) based on age, height, and pre-pregnancy BMI …” |
| (*b*) Describe any methods used to examine subgroups and interactions | NA | No subgroup/interaction analyses beyond employed vs unemployed. |
| (*c*) Explain how missing data were addressed | P5(Figure1) | “Incompletedata:Missingkeyvariables  .” |
| (*d*) *Cohort study*—If applicable, explain how loss to follow-up was addressed  *Case-control study*—If applicable, explain how matching of cases and controls was addressed  *Cross-sectional study*—If applicable, describe analytical methods taking account of sampling strategy | NA | Retrospective cohort with complete follow-up to delivery. |
| (*e*) Describe any sensitivity analyses | P7(L147-148) | “We conducted a sensitivity analysis excluding women with insulin use, results remained consistent (data not shown).” |
| Results | | | | |
| Participants | 13* | (a) Report numbers of individuals at each stage of study—eg numbers potentially eligible, examined for eligibility, confirmed eligible, included in the study, completing follow-up, and analysed | P5 | Figure 1 presents the flow of participants from initial screen to final matched pairs. |
| (b) Give reasons for non-participation at each stage | P5 | Reasons for exclusion listed in Figure 1 legend. |
| (c) Consider use of a flow diagram | P5 | Figure 1 is a flow diagram. |
| Descriptive data | 14* | (a) Give characteristics of study participants (eg demographic, clinical, social) and information on exposures and potential confounders | P8 | Table 2 gives demographic and clinical characteristics. |
| (b) Indicate number of participants with missing data for each variable of interest | P7(L110-111) | “Across the 124 matched participants, all variables used in the analysis had 0% missing values.” |
| (c) *Cohort study*—Summarise follow-up time (eg, average and total amount) | NA | Cross-sectional follow-up to delivery, no long-term follow-up time. |
| Outcome data | 15* | *Cohort study*—Report numbers of outcome events or summary measures over time | *P9* | Table 4 reports outcome events (e.g., cesarean delivery 17 vs 23). |
| *Case-control study—*Report numbers in each exposure category, or summary measures of exposure |  |  |
| *Cross-sectional study—*Report numbers of outcome events or summary measures |  |  |
| Main results | 16 | (*a*) Give unadjusted estimates and, if applicable, confounder-adjusted estimates and their precision (eg, 95% confidence interval). Make clear which confounders were adjusted for and why they were included | P9 | Table 4 provides unadjusted means/percentages; no further confounder adjustment post-matching. |
| (*b*) Report category boundaries when continuous variables were categorized | NA | No categorisation of continuous outcomes. |
| (*c*) If relevant, consider translating estimates of relative risk into absolute risk for a meaningful time period | NA | Not relevant (no relative risk translation). |

Continued on next page

| Other analyses | 17 | Report other analyses done—eg analyses of subgroups and interactions, and sensitivity analyses | P7(L222-228) | “Observed power was 58% for weight gain and 42% for cesarean delivery.” |
| --- | --- | --- | --- | --- |
| Discussion | | | | |
| Key results | 18 | Summarise key results with reference to study objectives | P13(L257-268) | “In this propensity score-matched analysis, we delineated a distinct pattern linking occupational status to metabolic and obstetric markers in GDM... occupational status showed no statistically significant association with key perinatal outcomes...” |
| Limitations | 19 | Discuss limitations of the study, taking into account sources of potential bias or imprecision. Discuss both direction and magnitude of any potential bias | P12(L221-236) | “4.3 Study Limitations” |
| Interpretation | 20 | Give a cautious overall interpretation of results considering objectives, limitations, multiplicity of analyses, results from similar studies, and other relevant evidence | P12(L238-255) | “4.4 Public Health Implications and Future Directions” |
| Generalisability | 21 | Discuss the generalisability (external validity) of the study results | P12(L232-234) | “The single-center, urban, high-income setting limits external validity …” |
| Other information | |  | | |
| Funding | 22 | Give the source of funding and the role of the funders for the present study and, if applicable, for the original study on which the present article is based | P14(L274) | | “None.” (no external funding) | | --- | |

*Give information separately for cases and controls in case-control studies and, if applicable, for exposed and unexposed groups in cohort and cross-sectional studies.

**Note:** An Explanation and Elaboration article discusses each checklist item and gives methodological background and published examples of transparent reporting. The STROBE checklist is best used in conjunction with this article (freely available on the Web sites of PLoS Medicine at http://www.plosmedicine.org/, Annals of Internal Medicine at http://www.annals.org/, and Epidemiology at http://www.epidem.com/). Information on the STROBE Initiative is available at www.strobe-statement.org.
